# Supplementary material for: Characterising symptom clusters in patients with atrial fibrillation undergoing catheter ablation
Source: PubMed Central journal article supplement — Open Heart. 2023 Aug 4;10(2):e002385. doi: 10.1136/openhrt-2023-002385 (PMC10407417; doi:10.1136/openhrt-2023-002385), 2023-08-04
Supplement: openhrt-2023-002385supp001.pdf [file openhrt-2023-002385supp001.pdf]

## SUPPLEMENTARY FILE

**Supplementary Table 1.** Associations between symptom clusters and age, gender, race, ethnicity, and heart failure status, n(%)

|                       | Asymptomatic (reference) | Broadly symptomatic | Dyspnea/ edema  | Chest pain      | Anxiety         | Fatigue/ palpitations |
|-----------------------|--------------------------|---------------------|-----------------|-----------------|-----------------|-----------------------|
| Age (65)              | 27(57%)                  | 441(59%)            | 68(57%)         | 53(47%)         | 86(62%)         | 63(51%)               |
| Gender (female)       | 9(19%)                   | <b>294(39%)*</b>    | 26(22%)         | 33(29%)         | <b>58(42%)*</b> | 35(28%)               |
| Race (non-White)      | 9(19%)                   | <b>329(44%)*</b>    | <b>51(43%)*</b> | <b>49(43%)*</b> | <b>57(41%)*</b> | <b>47(38%)*</b>       |
| Heart failure         | 20(69%)                  | 342(53%)            | 69(66%)         | <b>39(41%)*</b> | 62(57%)         | <b>43(44%)*</b>       |
| Diabetes              | 9(31%)                   | 145(22%)            | 22(21%)         | 18(19%)         | 22(20%)         | 22(22%)               |
| Hypertension          | 27(93%)                  | 556(86%)            | 84(81%)         | 74(79%)         | 94(87%)         | 87(89%)               |
| Stroke                | 3(10%)                   | 105(16%)            | 11(11%)         | 15(16%)         | 18 (17%)        | 11(11%)               |
| Vascular              | 23(79%)                  | 419(65%)            | 68(65%)         | 57(61%)         | 72(67%)         | 57(58%)               |
| Alcohol               | 28(65%)                  | 403(59%)            | 58(58%)         | 64(63%)         | 83(65%)         | 74(66%)               |
| Smoking               | 12(28%)                  | 210(31%)            | 17(17%)         | 28(27%)         | 30(23%)         | 27(24%)               |
| SDI (90)              | 8(18%)                   | 137(19%)            | 20(18%)         | 20(19%)         | 33(25%)         | 30(25%)               |
| Baseline Rate Control | 23(49%)                  | 412(55%)            | 58 (49%)        | 56(50%)         | 76(55%)         | 55(45%)               |
| Antiarrhythmic        | 8(17%)                   | 232(31%)            | 28(24%)         | 36 (32%)        | 33(24%)         | 33(27%)               |

\*Indicates significant differences of proportions compared to reference group (p<0.05) determined by Fisher's Exact Test

**Supplementary Figure 1.** Proportion of patients undergoing ablation who were asymptomatic at baseline over time\*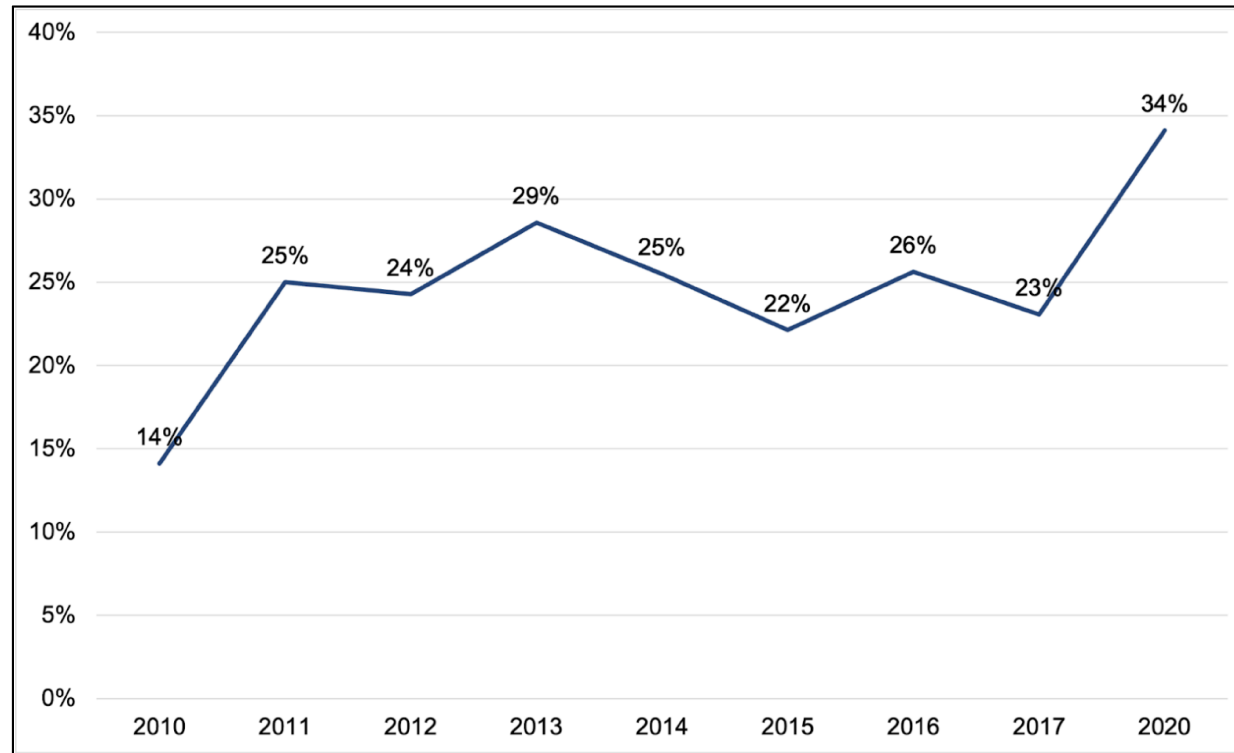

\*Data from 2018-2019 may not be reliable due to transitions in EHR vendors resulting in high missingness during this time period; these data are therefore excluded from our reporting.
